# Supplementary material for: Post-Kala-Azar Dermal Leishmaniasis
Source: PubMed Central journal article supplement (PMC11448539; doi:10.4269/ajtmh.24-0018), 2024-07-23

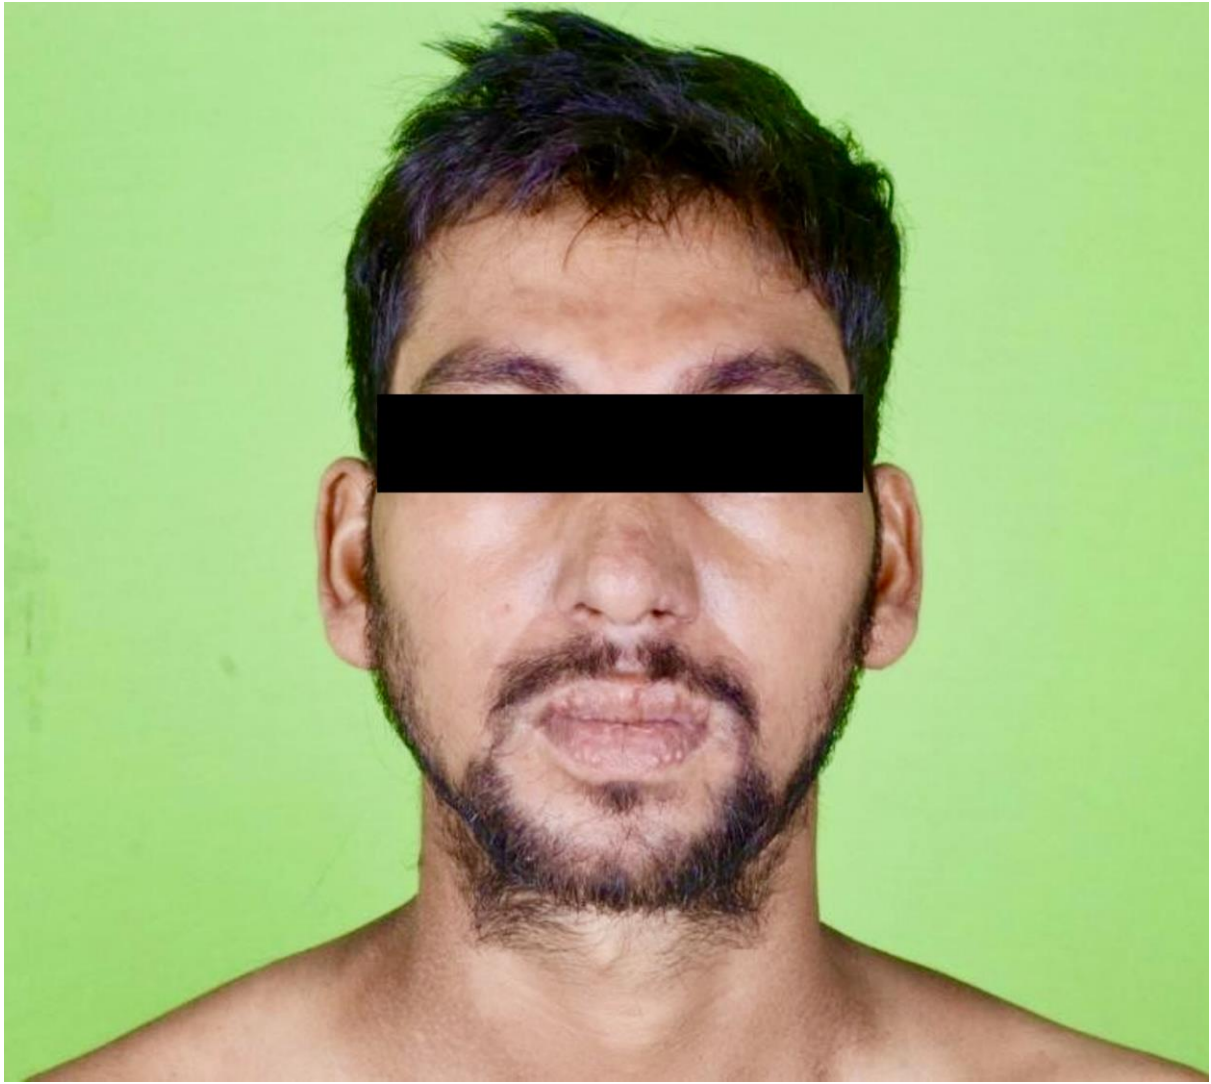

Supplement: tpmd240018.SD1.pdf [file tpmd240018.SD1.pdf]
